# Supplementary material
Source: Springer Nature journal article supplement (https://www.springermedizin.de/resource/supplementary/12893_2014_515_MOESM2_ESM.pdf/9512620)

# Any complication

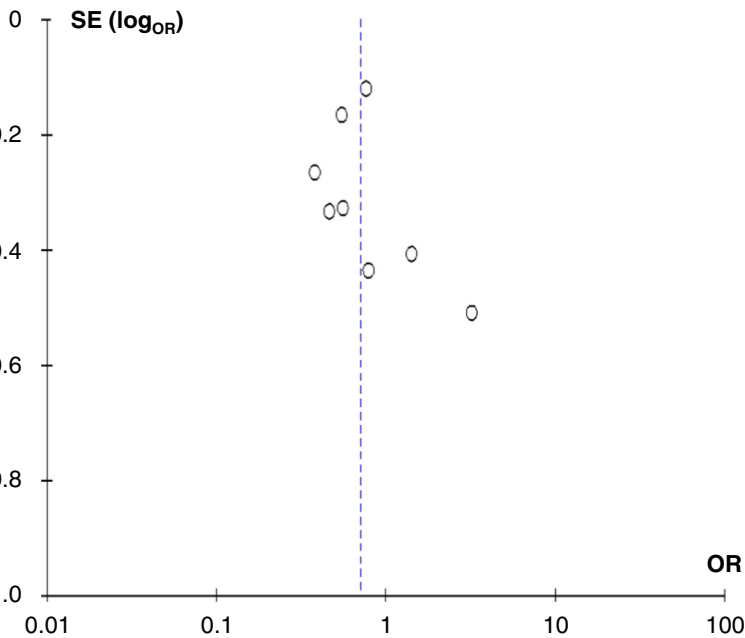

Supplement: MOESM2 [file 9512620]
